# Supplementary material for: Quantum chemical investigation of beta-CD–catechin flavonoid encapsulation in solution through NMR analysis: an adequate controlled drug-delivery system
Source: Royal Society of Chemistry journal article supplement (doi:10.1039/d1nj02756e), 2021-01-01
Supplement: d1nj02756e1.pdf [file d1nj02756e1.pdf]

**Lab  
el**

**Structure**

**Lab  
el**

(a)

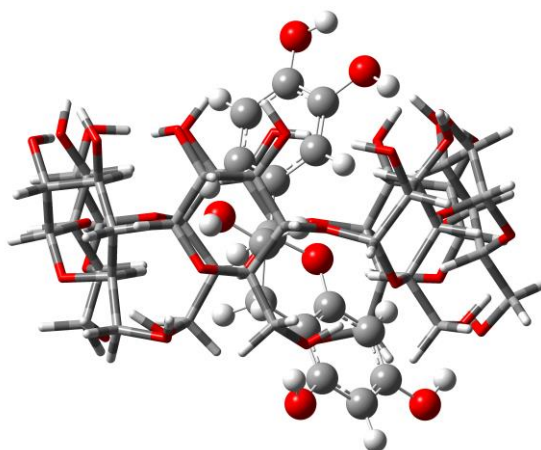

M1

(b)

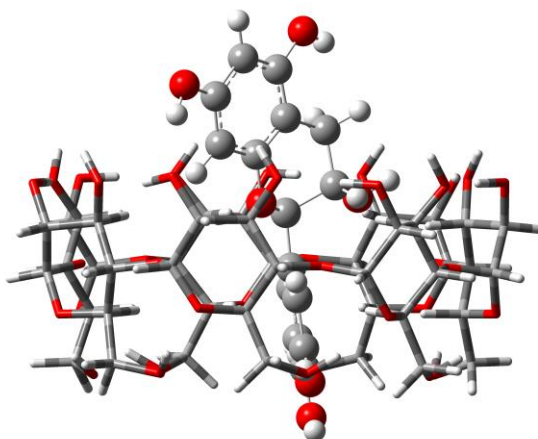

M2

(c)

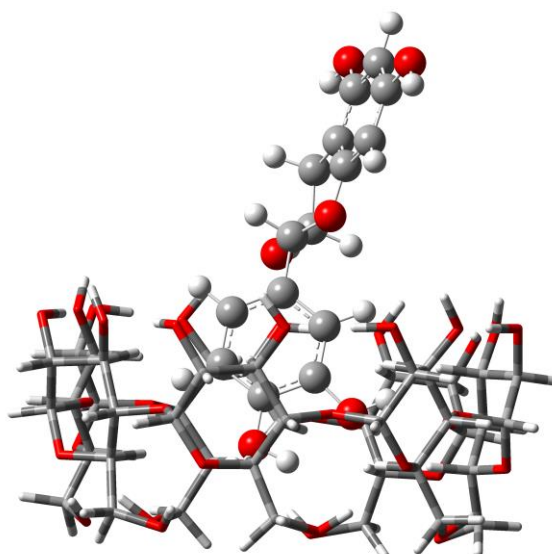

M3

(d)

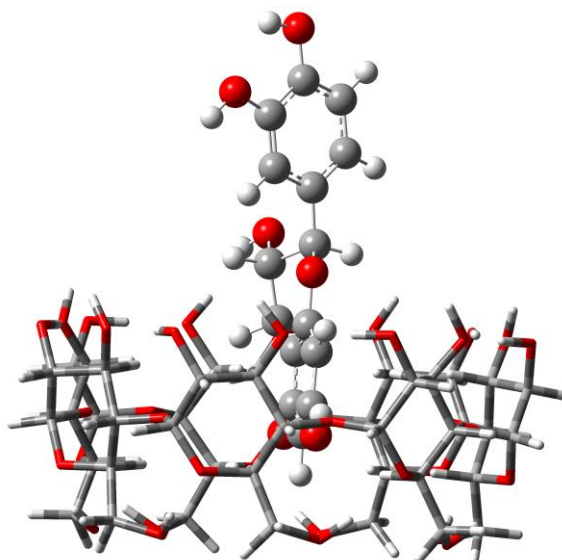

M4

(e)

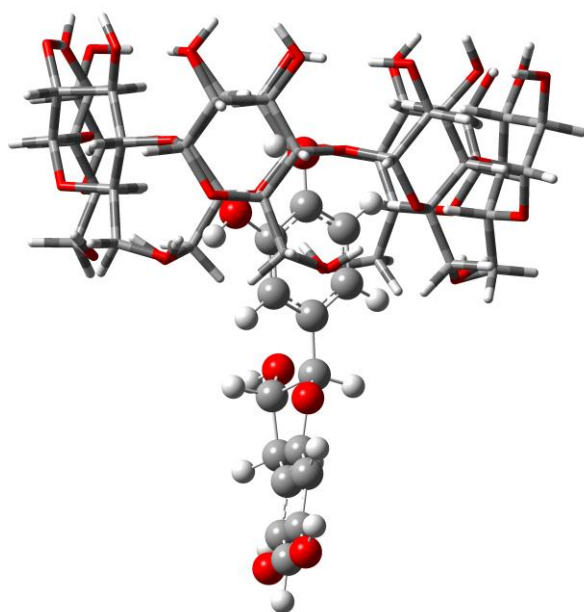

M5

(f)

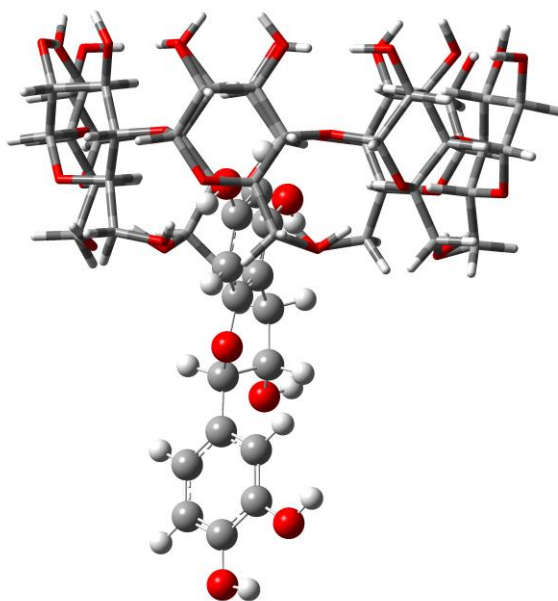

M6

(g)

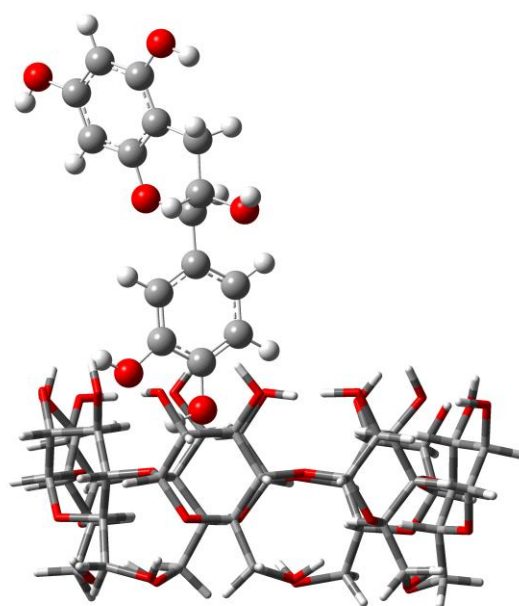

M7

(h)

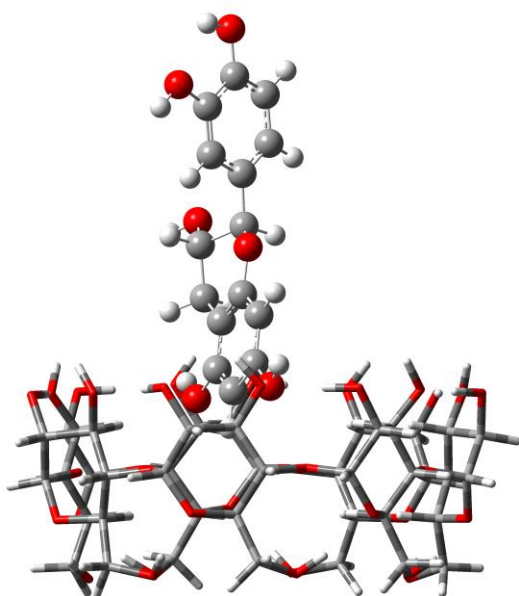

M8

(i)

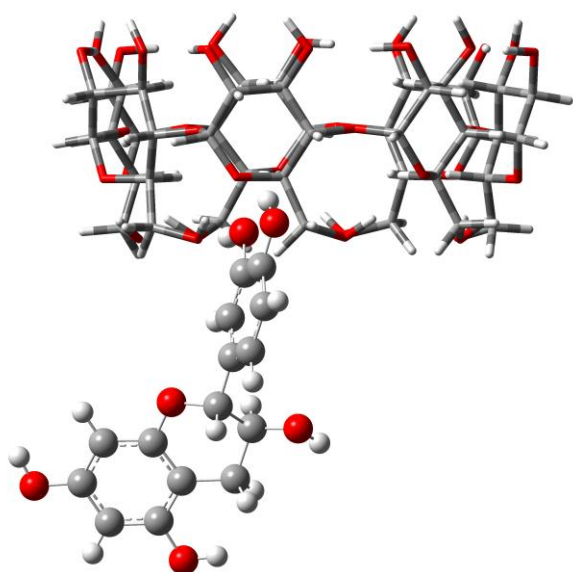

M9

(j)

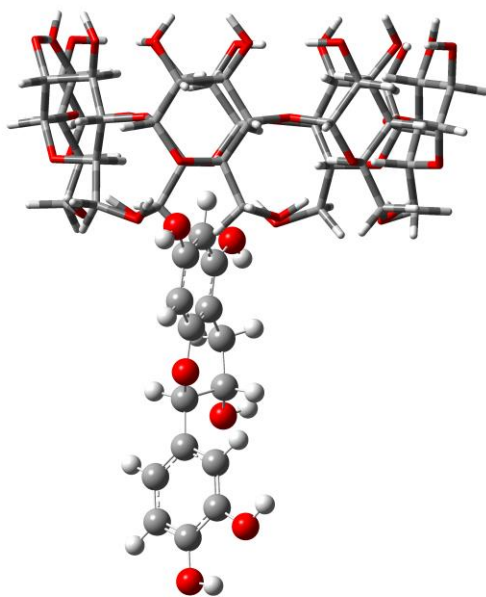

M10

(k)

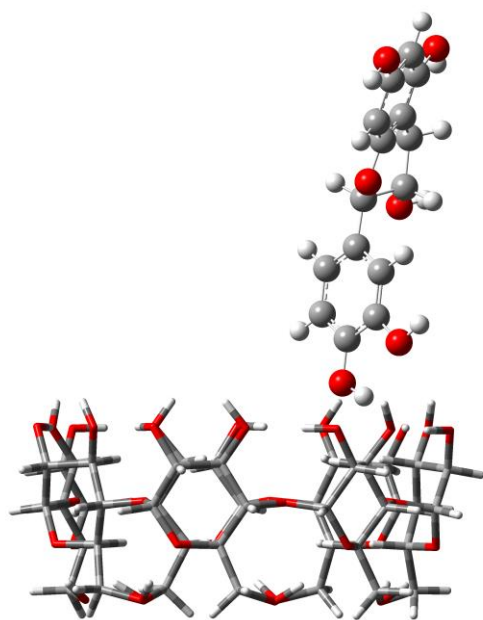

M11

(l)

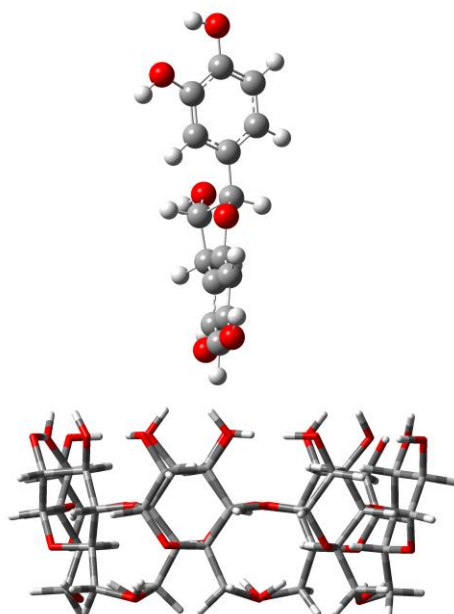

M12

(m)

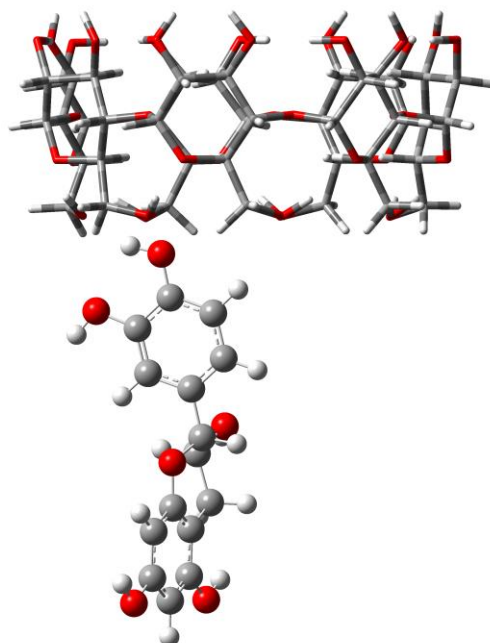

M13

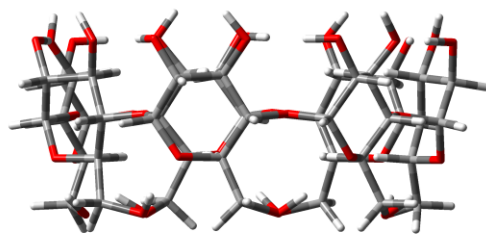

(n)

M14

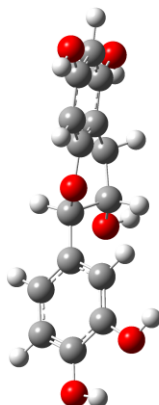

(o)

M15

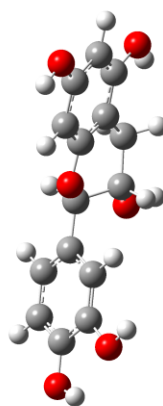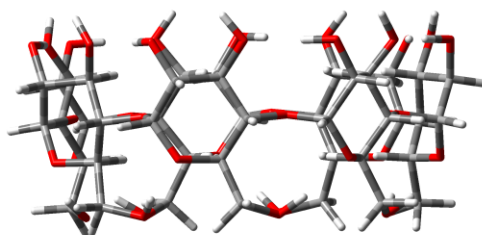

(p)

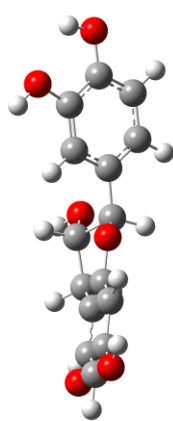

M16

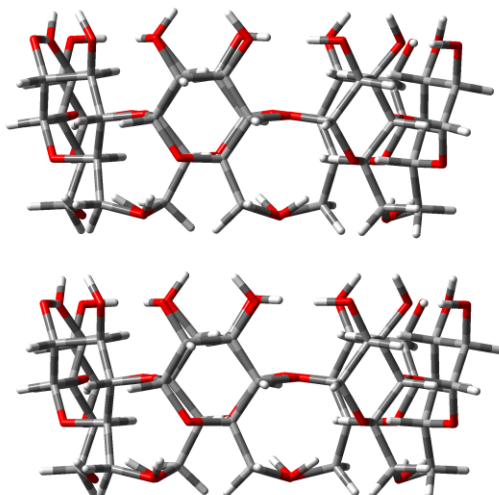

(q)

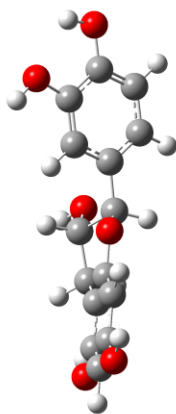

M17

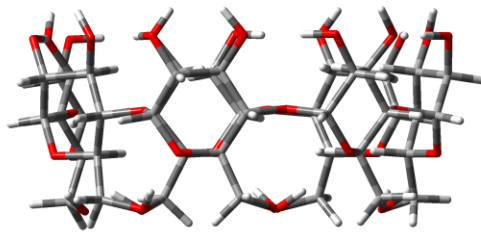

(r)

M18

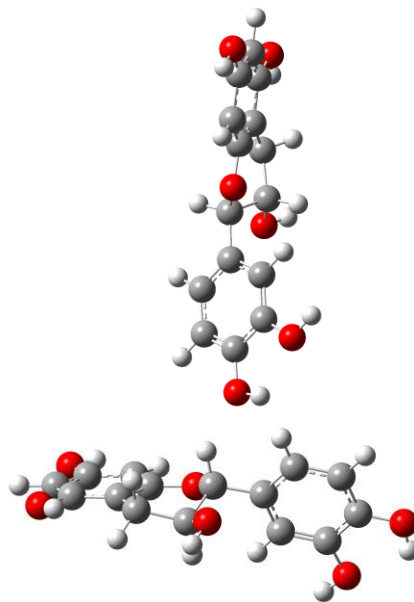

(s)

M19

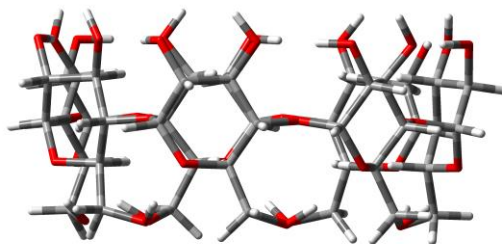

(t)

M20

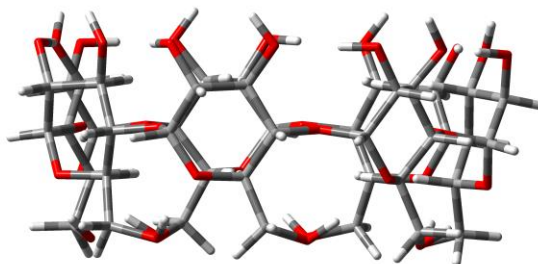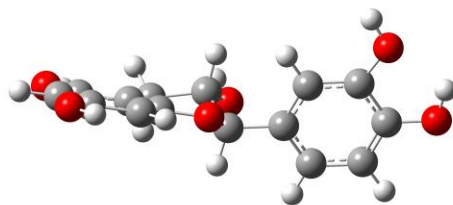

(u)

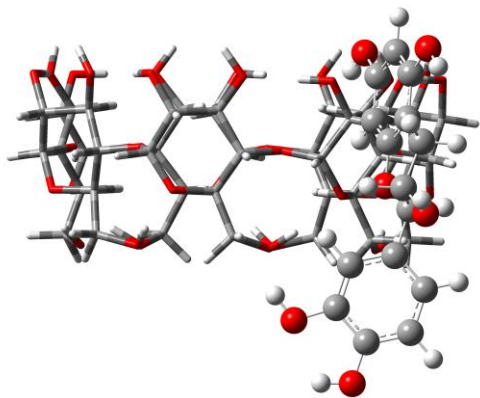

M21

(v)

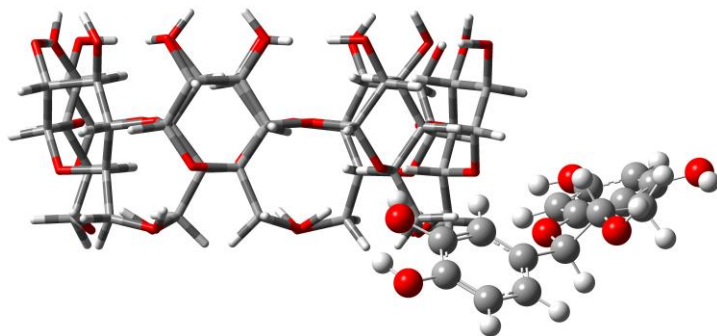

M22

(w)

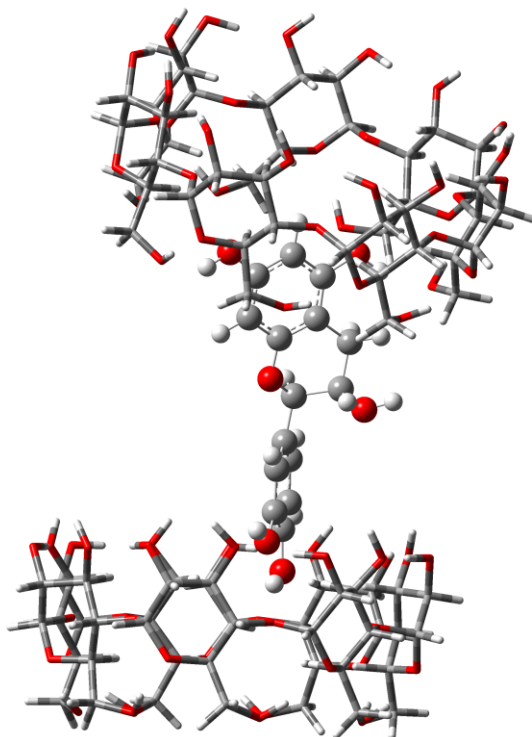

M23



(x)

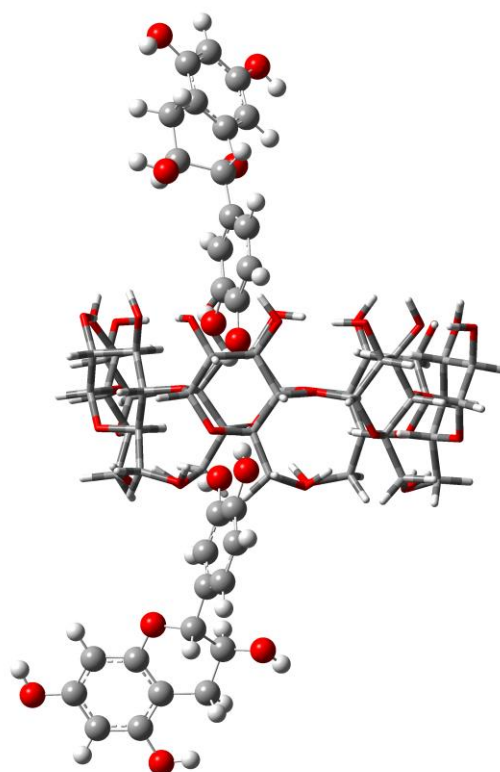

M24

(y)

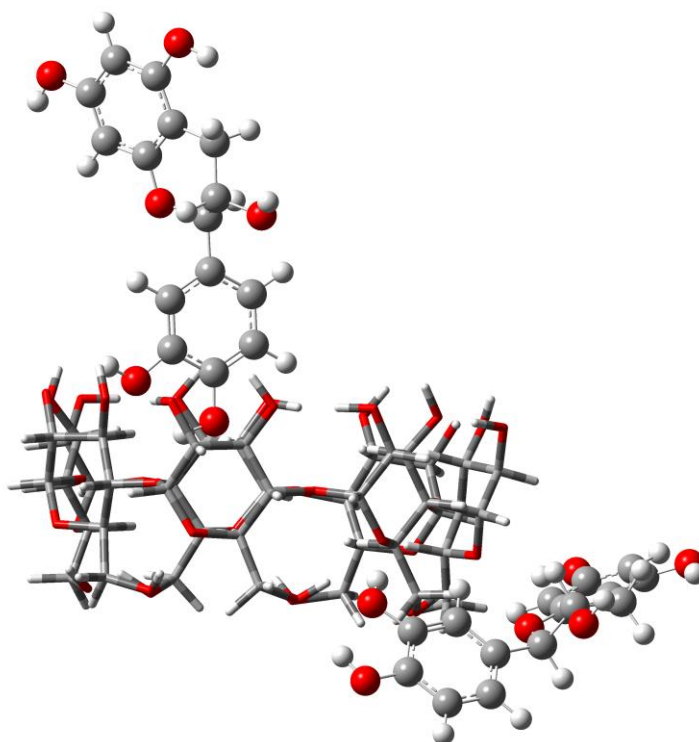

M25

(z)

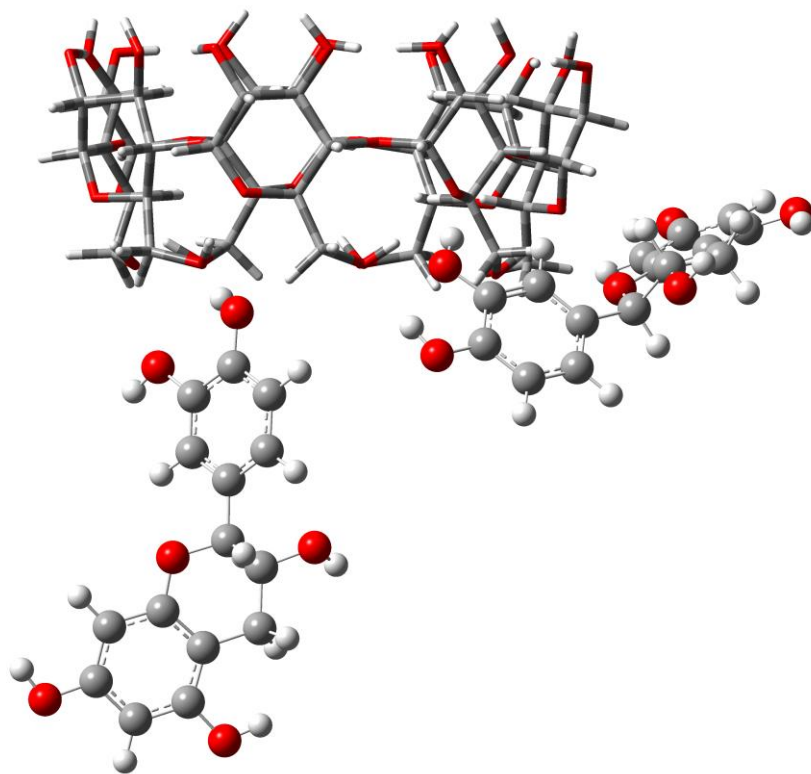

M26

(aa)

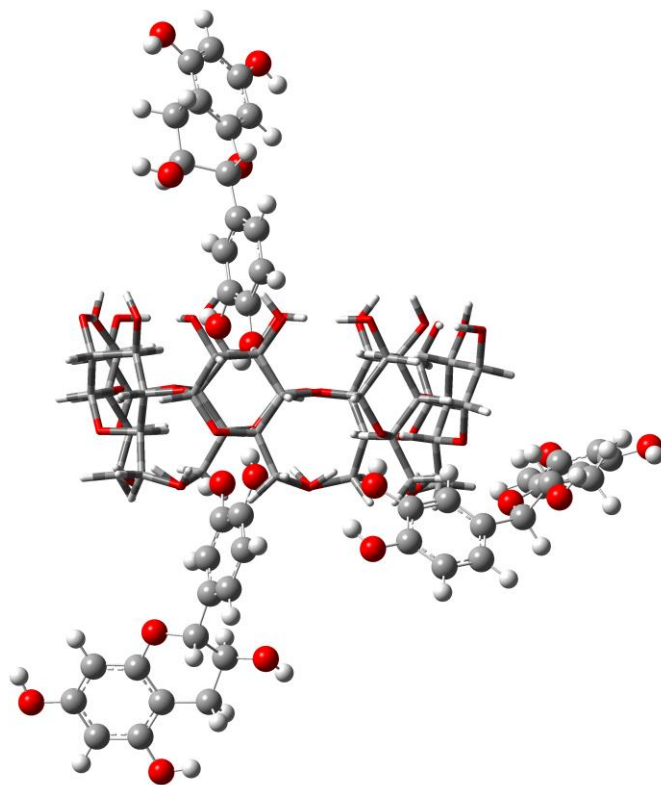

M27

(ab)

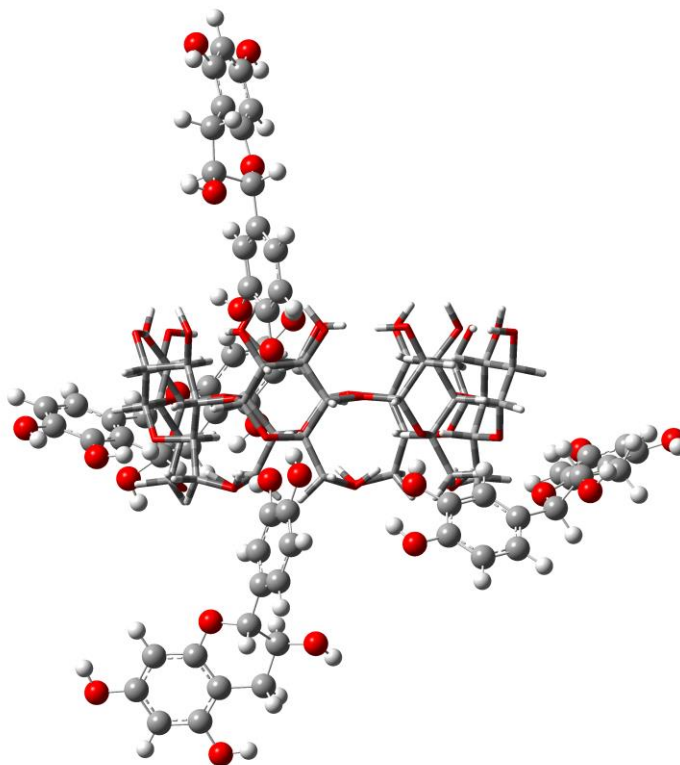

M28

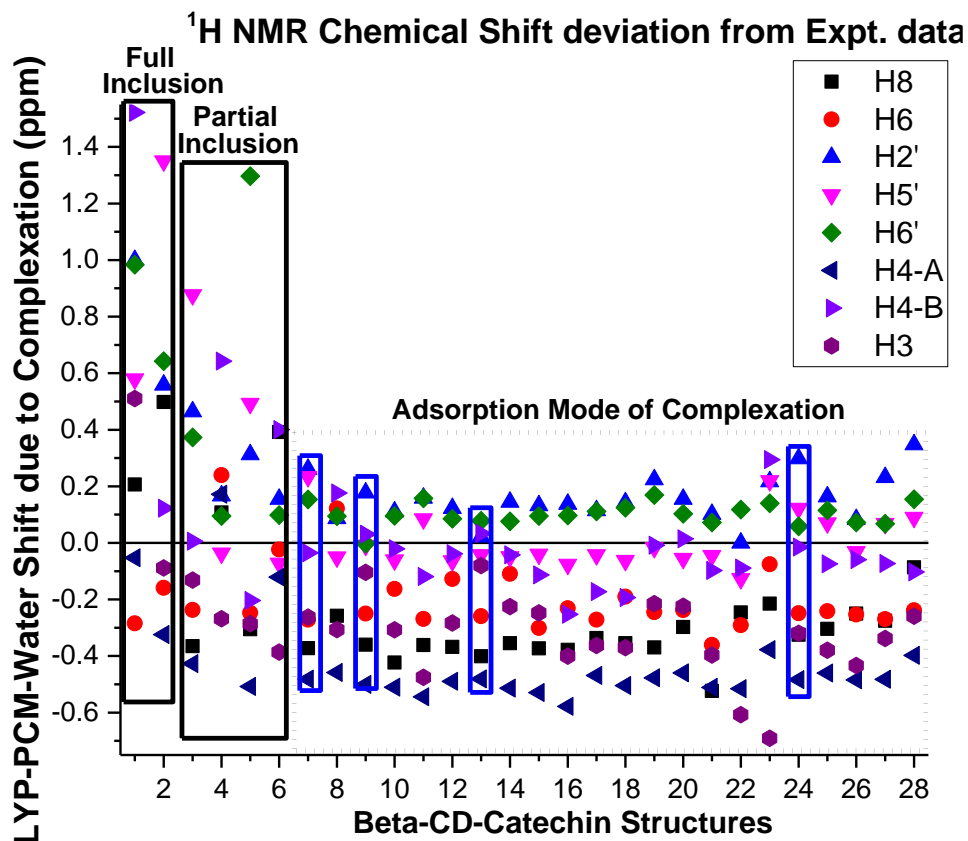

**Figure S2.** B3LYP/6-31G(d,p)-PCM-Water deviation from experimental <sup>1</sup>H NMR chemical shifts<sup>29</sup> for all 28 ωB97x-D/6-31G(d,p)-PCM-Water optimized catechin-Beta-CD complex structures. The description of the complexes is given below, where Beta-CD Rim-A (Primary Rim) and Rim-B (Secondary Rim) mode of Catechin interaction are indicated, as well as A and B ring protons approaching Beta-CD-ring (through H6 and H5' respectively).

**M1:** Full-Incl-H5'-Rim-A; **M2:** Full-Incl-H5'-Rim-B; **M3:** Incl-H5'-Rim-A; **M4:** Incl-H6-Rim-A; **M5:** Incl-H5'-Rim-B; **M6:** Incl-H6-Rim-B; **M7:** Part-Incl-H5'-Rim-A; **M8:** Part-Incl-H6-Rim-A; **M9:** Part-Incl-H5'-Rim-B; **M10:** Part-Incl-H6-Rim-B; **M11:** Ads-Perp-H5'-Rim-A; **M12:** Ads-Perp-H6-Rim-A; **M13:** Ads-Perp-H5'-Rim-B; **M14:** Ads-Perp-H6-Rim-B; **M15:** Weak-Ads-Perp-H5'-Rim-A; **M16:** Weak-Ads-Perp-H6-Rim-A; **M17:** Weak-Ads-Perp-H5'-Rim-B; **M18:** Weak-Ads-Perp-H6-Rim-B; **M19:** Ads-Parallel-H2'-Rim-A; **M20:** Ads-Parallel-H2'-Rim-B; **M21:** Ads-Lateral-1; **M22:** Ads-Lateral-2; **M23:** Ads-CAT-(BCD)<sub>2</sub>; **M24:** Ads-(CAT)<sub>2</sub>-BCD-Perpendicular-Rim-A-and-Rim-B; **M25:** Ads-(CAT)<sub>2</sub>-BCD-Perp-Rim-A-and-Lateral-Approach; **M26:** (CAT)<sub>2</sub>-BCD-Perp-Rim-B-and-Lateral-Approach; **M27:** (CAT)<sub>3</sub>-BCD-Perp-Rim-A-Perp-Rim-B-and-Lateral-Approach; **M28:** (CAT)<sub>4</sub>-BCD-Perpendicular-Lateral

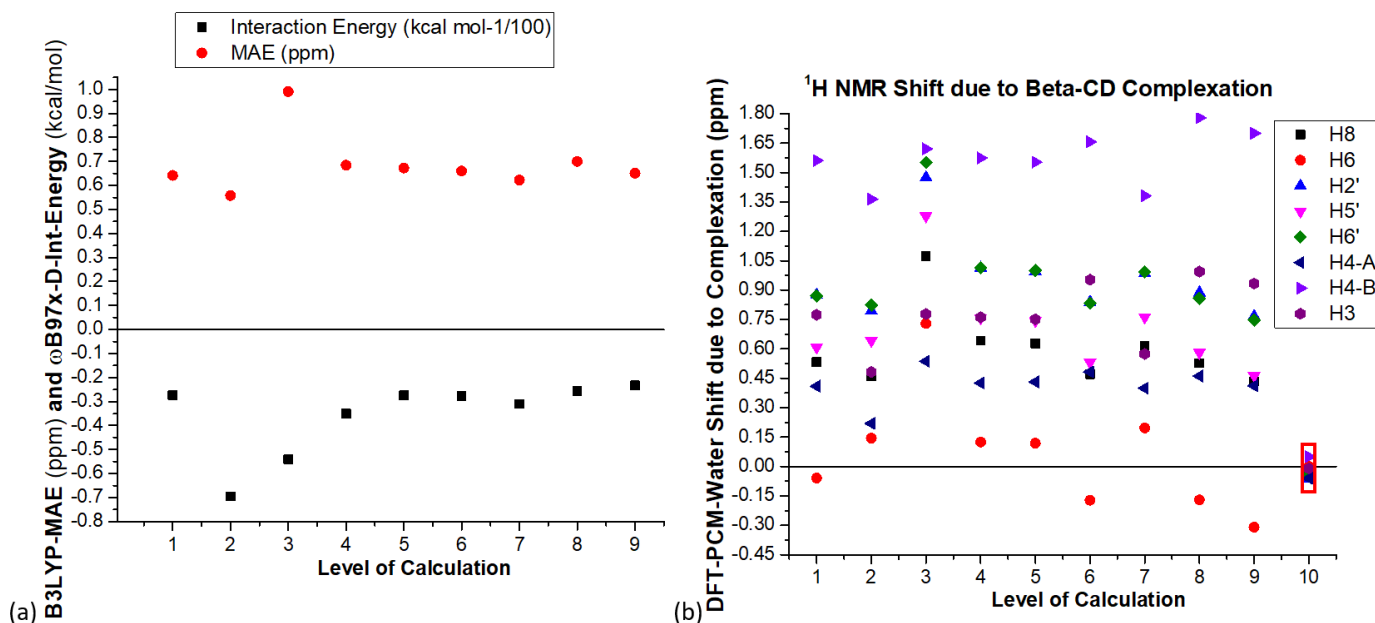

**Figure S3.** (a) Interaction energies ( $\Delta E_{\text{int}}$  in kcal mol<sup>-1</sup>) and MAE (ppm) values for structure M1 of Catechin-Beta-CD complex calculated with the 6-31G(d,p) basis set using various DFT functionals and PCM Model (water) (b) <sup>1</sup>H NMR chemical shift change due to complexation (ppm) values for structure M1 of Catechin-Beta-CD complex calculated with the 6-31G(d,p) basis set using various DFT functionals and PCM Model (water). Experimental data (in D<sub>2</sub>O) are also given.

**Method of Calculation:**

- (1) B3LYP/6-31G(d,p) (2)  $\omega$ B97x-D/6-31G(d,p) (3) M06-2x/6-31G(d,p) (4) PBE1PBE/6-31G(d,p) (5) MPW1PW91/6-31G(d,p) (6) TPSSTPSS/6-31G(d,p) (7) BHandHLYP/6-31G(d,p) (8) BP86/6-31G(d,p) (9) BLYP/6-31G(d,p) (10) Experimental data.

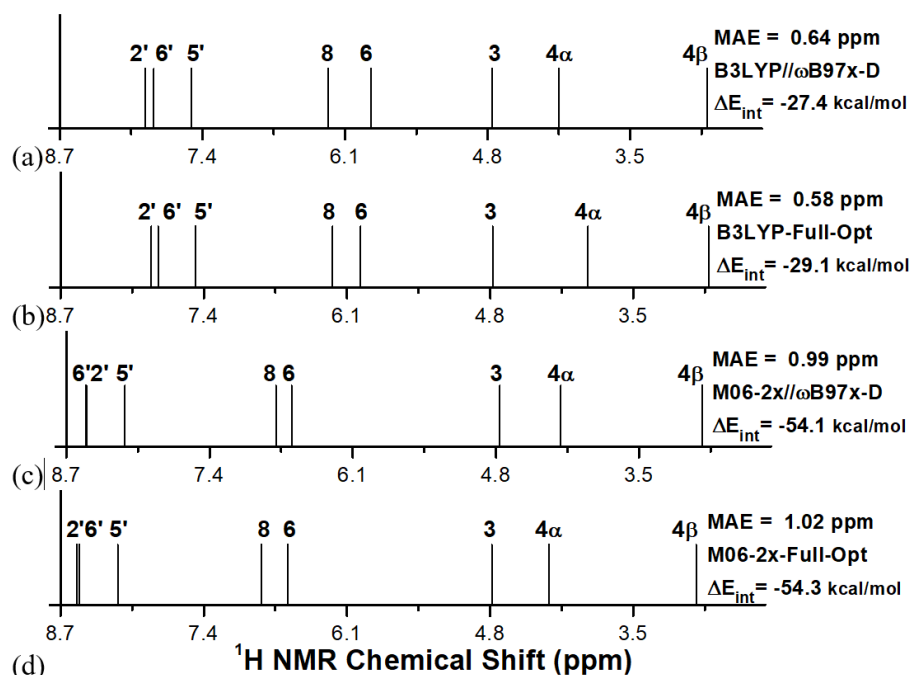

**Figure S4.** Comparison between DFT predictions of <sup>1</sup>H NMR spectrum for Catechin-Beta-CD structure M1 using single point B3LYP and M06-2x calculations at the geometry optimized with the  $\omega$ B97x-D functional (named B3LYP// $\omega$ B97x-D and M06-2x// $\omega$ B97x-D) and using the fully optimized geometries (named B3LYP-Full-Opt and M06-2x-Full-Opt). The 6-31G(d,p) basis set was used.

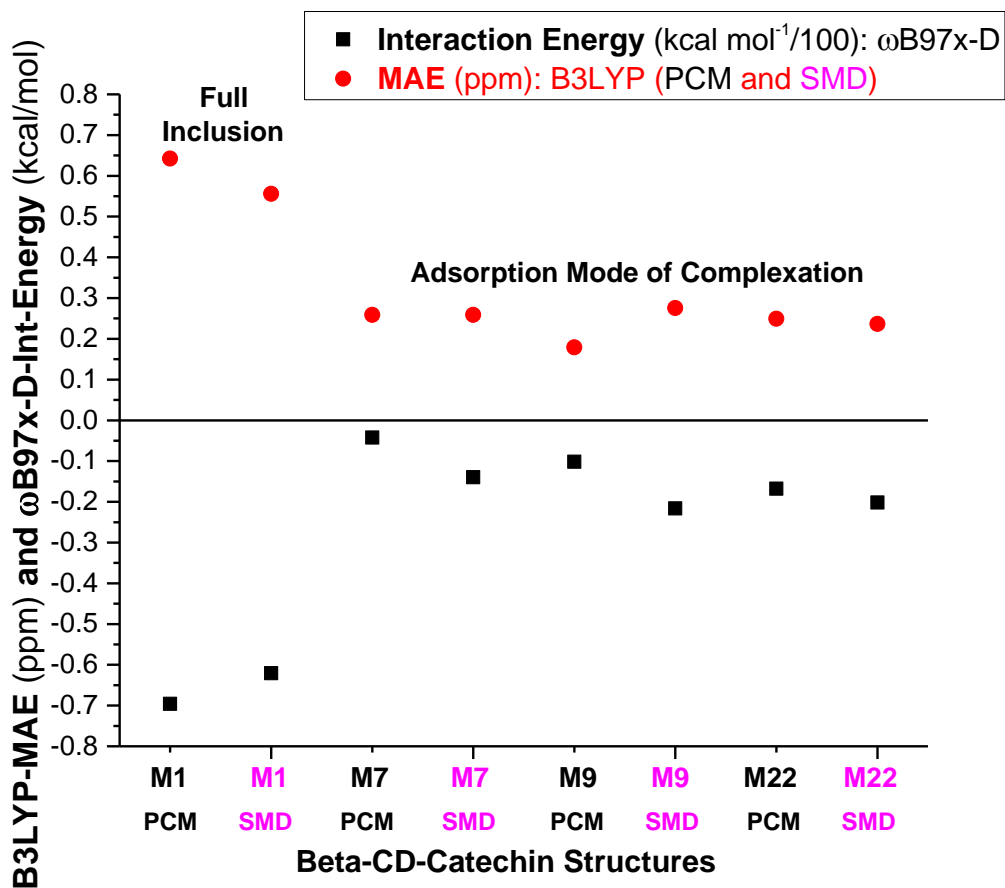

**Figure S5.** Comparison between-DFT-PCM-Water and DFT-SMD-Water interaction energy and MAE (<sup>1</sup>H NMR) results for selected catechin-Beta-CD complex structures.

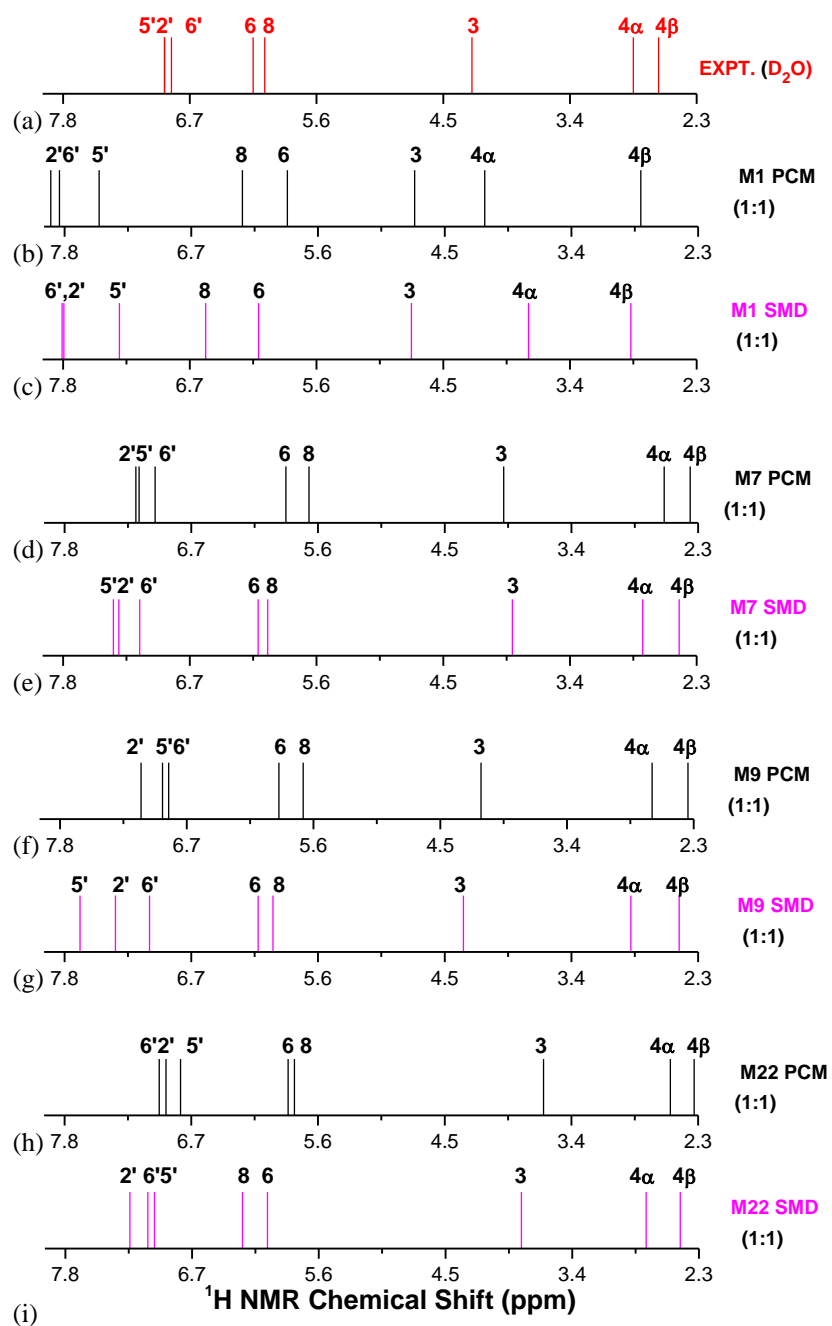

**Figure S6.** (a) Experimental (in  $\text{D}_2\text{O}$ ) and (b-i) B3LYP/6-31G(d,p)  $^1\text{H}$  NMR spectra calculated for representative optimized structures of catechin-Beta-CD complexes using the PCM and SMD solvation models in water.
